# Supplementary material for: Biofunctionalized Scaffold in Bone Tissue Repair
Source: PubMed Central journal article supplement (PMC5979468; doi:10.3390/ijms19041022), 2018-03-29
Supplement: ijms-19-01022-s001.pdf [file ijms-19-01022-s001.pdf]

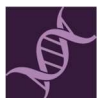

## Supplementary Materials: Biofunctionalized Scaffold in Bone Tissue Repair

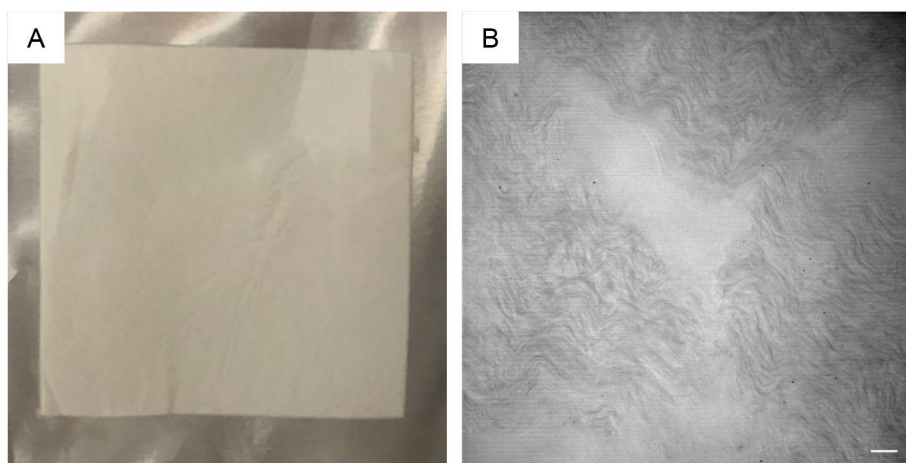

**Figure S1.** Scaffold material. (A) Macrophotograph of EVO membrane contained in a sterile wrap. (B) EVO membrane observed at Confocal Laser Scanning Microscope using transmitted light channel. Scale bar = 100  $\mu\text{m}$ .
